# Supplementary material for: High Hemoglobin Level is a Risk Factor for Maternal and Fetal Outcomes of Pregnancy in Chinese Women: A Retrospective Cohort Study
Source: Research Square preprint supplement (doi:10.21203/rs.3.rs-793648/v1), 2021-09-03
Supplement: Supplementary file 1 [file 3766dcc6e138051227cd56ca.docx]

Supplementary Table 1 ORs (95% CIs) of adverse pregnancy outcomes based on age according to Hb levels in the second trimester.

|  | Hb levels | | | | *P* trend | *P*-interaction |
| --- | --- | --- | --- | --- | --- | --- |
|  | 1 | 2 | 3 | 4 |  |
| PROM |  |  |  |  |  |  |
| Age (years) |  |  |  |  |  | 0.515 |
| <35 | 0.90 (0.60,1.32) | 1 | 1.31 (0.95, 1.80 | 1.18 (0.69,2.01) | 0.063 |  |
| ≥35 | 1.29 (0.74, 2.25) | 1 | 1.05 (0.61, 1.79) | 1.09 (0.48,2.46) | 0.609 |  |
| PTB | |  |  |  |  |  |
| Age (years) |  |  |  |  |  | 0.996 |
| <35 | 0.73 (0.37,1.44) | 1 | 0.77 (0.44,1.37) | 1.31 (0.58,2.93) | 0.558 |  |
| ≥35 | 2.06 (0.81,5.25) | 1 | 1.69 (0.67, 4.29) | 1.06 (0.21,5.28) | 0.574 |  |
| FIUD |  |  |  |  |  |  |
| Age (years) |  |  |  |  |  | 0.079 |
| <35 | 0.96 (0.47, 1.96) | 1 | 1.21 (0.67, 2.18) | 1.32 (0.52,12.33) | 0.401 |  |
| ≥35 | 0.63 (0.11, 3.54) | 1 | 1.94 (0.58, 6.51) | 2.98 (0.65, 13.62) | 0.056 |  |
| LBW |  |  |  |  |  |  |
| Age (years) |  |  |  |  |  | 0.305 |
| <35 | 0.88 (0.36, 2.18) | 1 | 1.52 (0.74, 3.12) | 2.86 (1.12, 7.32) | 0.025 |  |
| ≥35 | 2.40 (0.73, 7.95) | 1 | 1.04 (0.27, 4.03) | 1.92 (0.34, 10.66) | 0.429 |  |
| SGA |  |  |  |  |  |  |
| Age (years) |  |  |  |  |  | 0.523 |
| <35 | 1.54 (0.84, 2.85) | 1 | 1.14 (0.63, 2.09) | 1.32 (0.49, 3.58) | 0.567 |  |
| ≥35 | 0.80 (0.19, 3.38) | 1 | 0.69 (0.17, 2.85) | 1.81 (0.34, 9.76) | 0.692 |  |

Abbreviations: PROM: premature rupture of membranes; FIUD: fetal intrauterine distress; PTB: preterm birth; SGA: small-for-gestational-age infants; LGA: large-for-gestational-age infants. Logistic regression models were adjusted for age, prepregnancy BMI, education, smoking status, alcohol status, conception method, parity and history of miscarriage.

Supplementary Table 2 ORs (95% CIs) of adverse pregnancy outcomes based on age and BMI according to Hb levels in the third trimester.

|  | Hb levels | | | | *P* trend | *P*-interaction |
| --- | --- | --- | --- | --- | --- | --- |
|  | 1 | 2 | 3 | 4 |  |
| PROM |  |  |  |  |  |  |
| Age (years) |  |  |  |  |  | 0.515 |
| <35 | 0.92 (0.63, 1.34) | 1 | 0.99 (0.72, 1.38) | 0.96 (0.61, 1.52) | 0.820 |  |
| ≥35 | 1.74 (0.98, 3.09) | 1 | 1.20 (0.69, 2.07) | 1.84 (0.88, 3.84) | 0.874 |  |
| PTB | |  |  |  |  |  |
| Age (years) |  |  |  |  |  | 0.996 |
| <35 | 1.16 (0.60, 2.25) | 1 | 0.91 (0.50, 1.68) | 1.94 (0.97, 3.87) | 0.384 |  |
| ≥35 | 2.36 (0.99, 5.60) | 1 | 0.47 (0.15, 1.44) | 0.97 (0.24, 3.92) | 0.012 |  |
| FIUD |  |  |  |  |  |  |
| Age (years) |  |  |  |  |  | 0.079 |
| <35 | 0.54 (0.24, 1.21) | 1 | 1.22 (0.70, 2.13) | 0.44 (0.15, 1.30) | 0.597 |  |
| ≥35 | 0.31 (0.06, 1.69) | 1 | 1.16 (0.39, 3.47) | 0.30 (0.03, 2.76) | 0.597 |  |
| LBW |  |  |  |  |  |  |
| Age (years) |  |  |  |  |  | 0.305 |
| <35 | 0.87 (0.36, 2.10) | 1 | 0.96 (0.45, 2.04) | 2.10 (0.90, 4.87) | 0.143 |  |
| ≥35 | 2.95 (0.90, 9.70) | 1 | 0.46 (0.09, 2.45) | 2.57 (0.56, 11.70) | 0.188 |  |
| SGA |  |  |  |  |  |  |
| Age (years) |  |  |  |  |  | 0.523 |
| <35 | 1.18 (0.61, 2.30) | 1 | 1.09 (0.59, 2.00) | 1.55 (0.72, 3.32) | 0.596 |  |
| ≥35 | 0.54 (0.09, 3.01) | 1 | 0.43 (0.08, 2.29) | 4.19 (1.08, 16.25) | 0.081 |  |

Abbreviations: PROM: premature rupture of membranes; FIUD: fetal intrauterine distress; PTB: preterm birth; SGA: small-for-gestational-age infants; LGA: large-for-gestational-age infants. Logistic regression models were adjusted for age, prepregnancy BMI, education, smoking status, alcohol status, conception method, parity and history of miscarriage.

Supplementary Table 3 ORs (95% CIs) for adverse pregnancy outcomes according to hemoglobin levels after excluding pregnant women with GDM, gestational hypertension and gestational thyroid diseases.

|  | Hemoglobin levels (g/L) | | | |  |
| --- | --- | --- | --- | --- | --- |
|  | <110 | 110-119 | 120-129 | >130 | *P trend* |
| The second trimester | |  |  |  |  |
| PROM | 1.03 (0.73,1.44) | 1 | 1.27 (0.94,1.71) | 1.06 (0.64,1.76) | 0.319 |
| PTB | 0.99 (0.55,1.80) | 1 | 1.01 (0.59,1.74) | 1.36 (0.60,3.08) | 0.696 |
| FIUD | 0.82 (0.40,1.66) | 1 | 1.27 (0.72,2.25) | 1.44 (0.60,3.42) | 0.150 |
| LBW | 1.12 (0.51, 2.45) | 1 | 1.43 (0.72,2.85) | 2.49 (0.98,6.30) | 0.117 |
| SGA | 1.22 (0.66,2.26) | 1 | 1.07 (0.58,1.95) | 1.24 (0.46,3.36) | 0.884 |
| The third trimester | |  |  |  |  |
| PROM | 1.10 (0.77,1.54) | 1 | 0.93 (0.68,1.27) | 1.12 (0.72,1.73) | 0.680 |
| PTB | 1.39 (0.79,2.44) | 1 | 0.71 (0.39,1.31) | 1.74 (0.86,3.51) | 0.597 |
| FIUD | 0.54 (0.25,1.17) | 1 | 1.27 (0.74, 2.18) | 0.36 (0.10,1.23) | 0.493 |
| LBW | 1.38 (0.64,2.95) | 1 | 1.05 (0.50,2.20) | 2.65 (1.16,6.03) | 0.297 |
| SGA | 1.06 (0.53,2.09) | 1 | 1.03 (0.55,1.91) | 2.24 (1.10,4.58) | 0.139 |

Abbreviations: PROM: premature rupture of membranes; FIUD: fetal intrauterine distress; PTB: preterm birth; LBW: low-birth-weight infants; SGA: small-for-gestational-age infants. Adjustment for age, prepregnancy BMI, education, conception method, parity and history of miscarriage was conducted.
